# Supplementary material for: Characterization of Odorant Binding and Chemosensory Protein Families in the kissing bug Triatoma infestans; comparative analysis among Heteroptera species
Source: Research Square preprint supplement (doi:10.21203/rs.3.rs-6384226/v1), 2025-05-15
Supplement: Supplementary file 1 [file 64c1c6bc0523a3b530c4e30c.xlsx]

## Sheet: CSP
Species	Name	Protein ID	Gene ID	SignalP	Start codon	Stop codon	Conserved C	Length	Comments
Anopheles gambiae	Agam_CSP8	XP_001238548.4	LOC4577315	+	+	+	4	117	5
Anopheles gambiae	Agam_CSP5	XP_061514490.1	LOC1277892	+	+	+	4	275	1
Anopheles gambiae	Agam_CSP3	XP_061514496.1	LOC1277896	+	+	+	4	126	5
Anopheles gambiae	Agam_CSP6	XP_061515276.1	LOC4578332	+	+	+	4	123	5
Anopheles gambiae	Agam_CSP7	XP_317397.4	LOC1277889	+	+	+	4	107	5
Anopheles gambiae	Agam_CSP4	XP_317404.3	LOC1277895	+	+	+	4	168	5
Anopheles gambiae	Agam_CSP2	XP_317407.1/AGAP008052	LOC1277898	+	+	+	4	127	5
Anopheles gambiae	Agam_CSP1	XP_317408.3/AGAP008051	LOC1277899	+	+	+	4	127	5
Cimex lectularius	Clec_CSP10	XP_014242351.1	GeneID:106662643	+	+	+	4	126	5
Cimex lectularius	Clec_CSP3	XP_014242935.1	GeneID:106662989	+	+	+	4	134	5
Cimex lectularius	Clec_CSP1	XP_014243438.1	GeneID:106663257	+	+	+	4	125	5
Cimex lectularius	Clec_CSP17	XP_014252977.1	GeneID:106668594	+	+	-	3	92	3 and 5
Cimex lectularius	Clec_CSP11	XP_014252980.1	GeneID:106668596	+	+	+	4	129	5
Cimex lectularius	Clec_CSP12	XP_014252981.1	GeneID:106668597	+	+	+	4	129	5
Cimex lectularius	Clec_CSP13	XP_014253090.1	GeneID:106668653	+	+	+	4	129	5
Cimex lectularius	Clec_CSP15	XP_014253092.1	GeneID:106668654	+	+	+	4	129	5
Cimex lectularius	Clec_CSP2	XP_014253147.1	GeneID:106668689	+	+	+	4	127	5
Cimex lectularius	Clec_CSP6	XP_014255493.1	GeneID:106670027	+	+	+	4	119	5
Cimex lectularius	Clec_CSP5	XP_014255494.1	GeneID:106670028	+	+	+	4	118	5
Cimex lectularius	Clec_CSP4	XP_014256882.1	GeneID:106670801	+	+	+	4	125	5
Cimex lectularius	Clec_CSP8	XP_014258330.1	GeneID:106671885	+	+	+	4	121	1
Cimex lectularius	Clec_CSP16	XP_014258335.1	GeneID:106671888	+	+	+	4	125	5
Cimex lectularius	Clec_CSP7	XP_014259653.1	GeneID:106672615	+	+	+	4	110	5
Cimex lectularius	Clec_CSP9	XP_014260923.1	GeneID:106673348	+	+	+	4	117	5
Cimex lectularius	Clec_CSP14	XP_024081406.1	GeneID:106668581	+	+	+	4	129	5
Drosophila melanogaster	Dmel_CSP4	NP_524121.2	CG6642-RA	+	+	+	4	155	5
Drosophila melanogaster	Dmel_CSP2	NP_524966.1	CG11390-RA	+	+	+	4	126	5
Drosophila melanogaster	Dmel_CSP3	NP_611990.1	CG9358-RA	+	+	+	4	121	5
Drosophila melanogaster	Dmel_CSP1	NP_726402.1	CG30172-RA	+	+	+	4	112	5
Halyomorpha halys	Hhal_CSP9	XM_014416524.3	LOC106678159	+	+	+	4	126	5
Halyomorpha halys	Hhal_CSP10	XM_014421395.2	LOC106681195	+	+	+	4	109	5
Halyomorpha halys	Hhal_CSP8	XM_014421569.3	LOC106681317	+	+	+	4	126	5
Halyomorpha halys	Hhal_CSP11	XM_014421626.3	LOC106681351	+	+	+	4	126	1
Halyomorpha halys	Hhal_CSP3	XM_014421626.3	LOC106681351	+	+	+	4	130	1
Halyomorpha halys	Hhal_CSP12	XM_014421627.3	LOC106681352	+	+	+	4	120	5
Halyomorpha halys	Hhal_CSP13	XM_014421628.3	LOC106681353	+	+	+	4	117	5
Halyomorpha halys	Hhal_CSP17	XM_014421629.3	LOC106681354	+	+	+	4	114	5
Halyomorpha halys	Hhal_CSP2	XM_014421632.3	LOC106681357	+	+	+	4	126	5
Halyomorpha halys	Hhal_CSP6	XM_014421634.3	LOC106681358	+	+	+	4	131	5
Halyomorpha halys	Hhal_CSP15	XM_014421635.3	LOC106681359	+	+	+	4	121	5
Halyomorpha halys	Hhal_CSP19	XM_067044868.1	LOC106686895	+	+	-	2	126	3 and 5
Halyomorpha halys	Hhal_CSP7	XM_014430494.3	LOC106686897	+	+	+	4	135	5
Halyomorpha halys	Hhal_CSP1	XM_014430495.3	LOC106686898	+	+	+	4	113	5
Halyomorpha halys	Hhal_CSP20	XM_014432270.2	LOC106688012	+	+	+	4	130	5
Halyomorpha halys	Hhal_CSP16	XM_014433350.3	LOC106688752	+	+	+	4	126	5
Halyomorpha halys	Hhal_CSP22	XM_014436935.3	LOC106691225	+	+	+	4	127	5
Halyomorpha halys	Hhal_CSP23	XM_014436938.3	LOC106691226	+	+	+	4	126	5
Halyomorpha halys	Hhal_CSP18	XM_014436939.3	LOC106691228	+	+	+	4	123	5
Halyomorpha halys	Hhal_CSP21	XM_024361992.2	LOC112211040	+	+	+	4	118	5
Halyomorpha halys	Hhal_CSP14	XM_024363969.2	LOC112211752	+	+	+	4	110	5
Halyomorpha halys	Hhal_CSP5	XM_067049070.1	LOC136796161	+	+	+	4	128	5
Halyomorpha halys	Hhal_CSP4	Transcriptome/	Transcriptome/	+	+	+	4	128	5
Nilaparvata lugens	Nlug_CSP12	XP_022186800.2	LOC111045661	+	+	+	4	154	5
Nilaparvata lugens	Nlug_CSP4	XP_022186807.2	LOC111045668	+	+	+	4	171	5
Nilaparvata lugens	Nlug_CSP13	XP_022188430.2	LOC111047069	+	+	+	4	165	1
Nilaparvata lugens	Nlug_CSP1	XP_022188580.1	LOC111047195	+	+	+	4	131	5
Nilaparvata lugens	Nlug_CSP14	XP_022188591.1	LOC111047204	+	+	+	4	123	5
Nilaparvata lugens	Nlug_CSP8	XP_022188604.2-ACJ64054.1	LOC111047213	+	+	+	4	236	1
Nilaparvata lugens	Nlug_CSP11	XP_022188879.1	LOC111047432	+	+	+	4	129	5
Nilaparvata lugens	Nlug_CSP9	XP_022192879.1	LOC111050827	+	+	+	4	189	5
Nilaparvata lugens	Nlug_CSP7	XP_022193604.1	LOC111051400	+	+	+	4	137	5
Nilaparvata lugens	Nlug_CSP10	XP_022197409.1	LOC111054653	+	+	+	4	138	5
Nilaparvata lugens	Nlug_CSP5	XP_022200187.2-ACJ64052.1	LOC111057067	+	+	+	4	122	1
Nilaparvata lugens	Nlug_CSP6	XP_022201642.1-ACJ64053.1	LOC111058417	+	+	+	4	126	1
Nilaparvata lugens	Nlug_CSP15	XP_022203688.2	LOC111060335	+	+	+	4	130	5
Nilaparvata lugens	Nlug_CSP16	XP_039275119.1	LOC120349221	+	+	+	4	128	5
Nilaparvata lugens	Nlug_CSP3	XP_039276004.1-1	LOC111047276	+	+	+	4	129	1
Nilaparvata lugens	Nlug_CSP2	XP_039276004.1-2	LOC111047276	+	+	+	4	132	1
Nilaparvata lugens	Nlug_CSP17	XP_039277645.1	LOC111057066	+	+	+	4	112	1
Nilaparvata lugens	Nlug_CSP18	XP_039300420.1	LOC111045656	+	+	+	4	130	5
Nezara viridula	Nvir_CSP11	CAH1393629.1	NEZAVI_LOCUS4265	+	+	+	4	127	5
Nezara viridula	Nvir_CSP7	CAH1393650.1	NEZAVI_LOCUS4280	+	+	+	4	124	5
Nezara viridula	Nvir_CSP6	CAH1395036.1	NEZAVI_LOCUS5380	+	+	+	4	134	5
Nezara viridula	Nvir_CSP1	CAH1395227.1	NEZAVI_LOCUS5539	+	+	+	4	126	5
Nezara viridula	Nvir_CSP2	CAH1395229.1	NEZAVI_LOCUS5540	+	+	+	4	135	5
Nezara viridula	Nvir_CSP26	CAH1395231.1	NEZAVI_LOCUS5542	+	+	+	4	126	2
Nezara viridula	Nvir_CSP27	CAH1395232.1	NEZAVI_LOCUS5543	+	+	+	4	127	2
Nezara viridula	Nvir_CSP25	CAH1395233.1	NEZAVI_LOCUS5544	+	+	+	4	119	5
Nezara viridula	Nvir_CSP28	CAH1395234.1	NEZAVI_LOCUS5545	+	+	+	4	116	2
Nezara viridula	Nvir_CSP29	CAH1395235.1	NEZAVI_LOCUS5546	+	+	+	4	116	2
Nezara viridula	Nvir_CSP30	CAH1395236.1	NEZAVI_LOCUS5547	+	+	+	4	116	2
Nezara viridula	Nvir_CSP31	CAH1395237.1	NEZAVI_LOCUS5548	+	+	+	4	118	2
Nezara viridula	Nvir_CSP21	CAH1395238.1	NEZAVI_LOCUS5549	+	+	+	4	115	5
Nezara viridula	Nvir_CSP4	CAH1395239.1	NEZAVI_LOCUS5550	+	+	+	4	117	5
Nezara viridula	Nvir_CSP5	CAH1395240.1	NEZAVI_LOCUS5551	+	+	+	4	126	5
Nezara viridula	Nvir_CSP32	CAH1395241.1	NEZAVI_LOCUS5552	+	+	+	4	132	2
Nezara viridula	Nvir_CSP12	CAH1397025.1	NEZAVI_LOCUS6957	+	+	+	4	109	5
Nezara viridula	Nvir_CSP8	CAH1398577.1	NEZAVI_LOCUS8196	+	+	+	4	126	1
Nezara viridula	Nvir_CSP8	CAH1398578.1	NEZAVI_LOCUS8197	+	+	+	4	126	1
Nezara viridula	Nvir_CSP9	CAH1400269.1	NEZAVI_LOCUS9549	+	+	+	4	109	5
Nezara viridula	Nvir_CSP3	QCZ25117.1		+	+	+	4	128	4
Nezara viridula	Nvir_CSP10	QCZ25124.1		+	+	+	4	127	4
Nezara viridula	Nvir_CSP13	QCZ25127.1		+	+	+	4	127	4
Nezara viridula	Nvir_CSP14	QCZ25128.1		+	+	+	4	128	4
Nezara viridula	Nvir_CSP15	QCZ25129.1		-	+	+	4	108	4
Nezara viridula	Nvir_CSP16	QCZ25130.1		+	+	+	4	129	4
Nezara viridula	Nvir_CSP17*	QCZ25131.1		-	-	+	4	92	3 and 4
Nezara viridula	Nvir_CSP18	QDK59987.1		+	+	+	4	129	4
Nezara viridula	Nvir_CSP19	QCZ25132.1		+	+	+	4	101	4
Nezara viridula	Nvir_CSP22*	QDK59988.1		-	-	+	4	79	3 and 4
Nezara viridula	Nvir_CSP23*	QCZ25135.1		+	+	-	4	91	3 and 4
Nezara viridula	Nvir_CSP24	QCZ25136.1		+	+	+	4	125	4
Nezara viridula	Nvir_CSP20	QCZ25133.1		+	+	+	4	116	3 and 4
Orius laevigatus	Olae_CSP16*	Olae002860.1	ID=Olae002860	-	-	+	2	90	3 and 5
Orius laevigatus	Olae_CSP13	Olae002861.1	ID=Olae002861	+	+	+	4	105	5
Orius laevigatus	Olae_CSP5	Olae003037.1	ID=Olae003037	+	+	+	4	116	5
Orius laevigatus	Olae_CSP6	Olae003038.1	ID=Olae003038	+	+	+	4	123	5
Orius laevigatus	Olae_CSP17*	Olae003234.1	ID=Olae003234	+	+	-	2	94	3 and 5
Orius laevigatus	Olae_CSP1	Olae007145.1	ID=Olae007145	+	+	+	4	122	5
Orius laevigatus	Olae_CSP14	Olae007517.1	ID=Olae007517	+	+	+	4	124	5
Orius laevigatus	Olae_CSP8	Olae007765.1	ID=Olae007765	+	+	+	4	126	5
Orius laevigatus	Olae_CSP3	Olae007769.1	ID=Olae007769	+	+	+	4	125	5
Orius laevigatus	Olae_CSP15	Olae009870.1	ID=Olae009870	+	+	+	4	123	5
Orius laevigatus	Olae_CSP10	Olae009955.1	ID=Olae009955	+	+	+	4	124	5
Orius laevigatus	Olae_CSP12	Olae011496.1	ID=Olae011496	+	+	+	4	130	5
Orius laevigatus	Olae_CSP11	Olae011497.1	ID=Olae011497	+	+	+	4	129	5
Orius laevigatus	Olae_CSP9	Olae011498.1	ID=Olae011498	+	+	+	4	127	5
Orius laevigatus	Olae_CSP2	Olae011499.1	ID=Olae011499	+	+	+	4	122	5
Orius laevigatus	Olae_CSP7	Olae013075.1	ID=Olae013075	+	+	+	4	110	5
Orius laevigatus	Olae_CSP4	Olae015558.1	ID=Olae015558	+	+	+	4	141	5
Rhodnius prolixus	Rpro_CSP19	RPRC000126-PA	RPRC000126	+	+	+	4	121	5
Rhodnius prolixus	Rpro_CSP18	RPRC000242-PA	RPRC000242	+	+	+	4	126	5
Rhodnius prolixus	Rpro_CSP16	RPRC000327-PA	RPRC000327	+	+	+	4	129	5
Rhodnius prolixus	Rpro_CSP6	RPRC000332-PA	RPRC000332	+	+	+	4	126	5
Rhodnius prolixus	Rpro_CSP9	RPRC000470-PA	RPRC000470	+	+	+	4	109	5
Rhodnius prolixus	Rpro_CSP15	RPRC000546-PA	RPRC000546	-	-	+	2	90	3 and 5
Rhodnius prolixus	Rpro_CSP8	RPRC000631-PA	RPRC000631	+	+	+	4	132	5
Rhodnius prolixus	Rpro_CSP14	RPRC006791-PA	RPRC006791	-	-	+	2	75	3 nad 5
Rhodnius prolixus	Rpro_CSP17	RPRC007134-PA	RPRC007134	+	+	+	4	139	5
Rhodnius prolixus	Rpro_CSP10	RPRC007979-PA	RPRC007979	+	+	+	4	127	5
Rhodnius prolixus	Rpro_CSP7	RPRC010107-PA	RPRC010107	+	+	+	4	112	5
Rhodnius prolixus	Rpro_CSP13	RPRC011926-PA	RPRC011926	+	+	+	4	129	5
Rhodnius prolixus	Rpro_CSP12	RPRC011928-PA	RPRC011928	+	+	+	4	135	5
Rhodnius prolixus	Rpro_CSP11	RPRC011935-PA	RPRC011935	+	+	+	4	129	5
Rhodnius prolixus	Rpro_CSP5	RPRC013218-PA	RPRC013218	+	+	+	4	126	5
Rhodnius prolixus	Rpro_CSP2	RPRC013221-PA	RPRC013221	+	+	+	4	127	5
Rhodnius prolixus	Rpro_CSP1	RPRC013223-PA	RPRC013223	+	+	+	4	128	5
Rhodnius prolixus	Rpro_CSP3	RPRC013280-PA	RPRC013280	+	+	+	4	127	1
Rhodnius prolixus	Rpro_CSP4	RPRC013285-PA	RPRC013285	+	+	+	4	127	5
*=Not included in phylogenetic analysis
1) Corrected, 2) Described here for the first time, 3) Partial sequence, 4) Present only in transcriptome, 5) automatic prediction confirmed.

## Sheet: OBP
Species	Name	Protein ID	Gene ID	SignalP	Start Codon	Stop codon	Conserved C	length	Comments	Classification
Anopheles gambiae	Agam_OBP1	XP_001231183.1	AGAP003309	+	-	+	6	144	5	Classic
Anopheles gambiae	Agam_OBP2	XP_319532.4	AGAP003306	+	+	+	6	157	5	Classic
Anopheles gambiae	Agam_OBP3	XP_061497208.1	AGAP001409	+	+	+	6	153	5	Classic
Anopheles gambiae	Agam_OBP4	XP_314462.2	AGAP010489	+	+	+	6	150	5	Classic
Anopheles gambiae	Agam_OBP5	XP_318661.3	AGAP009629	+	+	+	6	156	5	Classic
Anopheles gambiae	Agam_OBP6	XP_313271.2	AGAP003530	+	-	+	6	155	5	Classic
Anopheles gambiae	Agam_OBP7	XP_321558.2	AGAP001556	+	+	+	6	154	5	Classic
Anopheles gambiae	Agam_OBP8	XP_061513604.1	AGAP000279	+	+	+	6	134	5	Classic
Anopheles gambiae	Agam_OBP9	XP_310842.1	AGAP000278	+	+	+	6	139	5	Classic
Anopheles gambiae	Agam_OBP10	XP_061504263.1	AGAP001189	+	+	+	6	138	5	Classic
Anopheles gambiae	Agam_OBP11	XP_321029.1	AGAP002025	+	+	+	6	192	5	Classic
Anopheles gambiae	Agam_OBP12	XP_061519127.1	AGAP002188	+	+	+	6	127	5	Classic
Anopheles gambiae	Agam_OBP13	XP_321029.1	AGAP002189	+	+	+	6	185	5	Classic
Anopheles gambiae	Agam_OBP14	XP_311996.2	AGAP002905	+	+	+	6	149	5	Classic
Anopheles gambiae	AgamOBP15/16	XP_001231181.3	AGAP003307	+	+	+	6	136	5	Classic
Anopheles gambiae	AgamOBP18/24	XP_061513539.1	AGAP012319	-	-	+	6	133	5	Classic
Anopheles gambiae	Agam_OBP19	XP_061498701.1	AGAP004433	-	-	+	6	120	5	Classic
Anopheles gambiae	Agam_OBP20	XP_061500951.1	AGAP005208	-	-	+	6	150	5	Classic
Anopheles gambiae	Agam_OBP21	XP_061511001.1	AGAP008398	+	+	+	6	136	5	Classic
Anopheles gambiae	Agam_OBP22	XP_061519127.1	AGAP010409	+	+	+	6	148	5	Classic
Anopheles gambiae	Agam_OBP23	XP_320226.1	AGAP012318	+	+	+	6	131	5	Classic
Anopheles gambiae	Agam_OBP25	XP_320224.3	AGAP012320	+	+	+	6	142	5	Classic
Anopheles gambiae	Agam_OBP26	XP_320224.3	AGAP012321	+	+	+	6	128	5	Classic
Anopheles gambiae	Agam_OBP27	XP_061513859.1	AGAP012323	+	-	+	6	139	5	Classic
Anopheles gambiae	Agam_OBP28	XP_320222.3	AGAP012325	+	+	+	6	134	5	Classic
Anopheles gambiae	Agam_OBP29	XP_061509490.1	AGAP012331	+	+	+	6	109	5	Atypical
Anopheles gambiae	Agam_OBP30	XP_320864.2	AGAP011647	+	+	+	6	273	5	Classic
Anopheles gambiae	Agam_OBP31	XP_061514907.1	AGAP010649	+	+	+	6	298	5	Two-Domain
Anopheles gambiae	Agam_OBP32	XP_061508963.1	AGAP000638	+	+	+	6	293	5	Two-Domain
Anopheles gambiae	Agam_OBP33	XP_311167.2	AGAP000640	+	+	+	6	334	5	Two-Domain
Anopheles gambiae	Agam_OBP34	XP_061508961.1	AGAP000641	+	+	+	4	311	5	Classic
Anopheles gambiae	Agam_OBP35	XP_061508968.1	AGAP000642	+	+	+	4	277	5	Classic
Anopheles gambiae	Agam_OBP36	XP_559275.2	AGAP000643	+	+	+	4	277	5	Classic
Anopheles gambiae	Agam_OBP37	XP_061508961.1	AGAP000644	+	+	+	4	311	5	Classic
Anopheles gambiae	Agam_OBP38	XP_061498203.1	AGAP000580	+	+	+	6	314	5	Classic
Anopheles gambiae	Agam_OBP39	XP_307997.3	AGAP002190	+	+	+	4	285	5	Two-Domain
Anopheles gambiae	Agam_OBP40	XP_307996.3	AGAP002191	+	+	+	6	302	5	Two-Domain
Anopheles gambiae	Agam_OBP41	XP_314081.2	AGAP005182	+	+	+	6	279	5	Two-Domain
Anopheles gambiae	Agam_OBP42	XP_061515244.1	AGAP009065	-	+	+	6	288	5	Classic
Anopheles gambiae	Agam_OBP43	XP_310079.4	AGAP009402	+	+	+	6	333	5	Two-Domain
Anopheles gambiae	Agam_OBP44	XP_061514907.1	AGAP010648	+	+	+	6	389	5	Two-Domain
Anopheles gambiae	Agam_OBP45	XP_311368.4	AGAP010650	+	+	+	4	356	5	Two-Domain
Anopheles gambiae	Agam_OBP46	XP_001687968.2	AGAP007289	+	+	+	6	202	5	PlusC-OBP
Anopheles gambiae	Agam_OBP47	XP_308532.4	AGAP007287	-	-	+	6	228	5	PlusC-OBP
Anopheles gambiae	Agam_OBP48	XP_308533.3	AGAP007286	+	+	+	6	200	5	PlusC-OBP
Anopheles gambiae	Agam_OBP49	XP_316128.4	AGAP006075	+	+	+	6	170	5	PlusC-OBP
Anopheles gambiae	Agam_OBP50	XP_316128.4	AGAP006076	-	-	+	6	146	5	PlusC-OBP
Anopheles gambiae	Agam_OBP51	XP_316130.5	AGAP006077	+	+	+	6	190	5	PlusC-OBP
Anopheles gambiae	Agam_OBP52		AGAP006078	+	-	+	6	170	5	PlusC-OBP
Anopheles gambiae	Agam_OBP53	XP_061502133.1	AGAP006079	-	+	+	6	137	5	PlusC-OBP
Anopheles gambiae	Agam_OBP54	XP_316134.4	AGAP006080	+	+	+	6	181	5	PlusC-OBP
Anopheles gambiae	Agam_OBP55	XP_061496677.1	AGAP006081	+	+	+	6	162	5	PlusC-OBP
Anopheles gambiae	Agam_OBP56	XP_317953.3	AGAP011367	+	+	+	6	235	5	PlusC-OBP
Anopheles gambiae	Agam_OBP57	XP_317952.4	AGAP011368	+	+	+	6	204	5	PlusC-OBP
Anopheles gambiae	Agam_OBP58	XP_556765.4	AGAP006074	+	+	+	6	270	5	PlusC-OBP
Anopheles gambiae	Agam_OBP59	XP_565443.2	AGAP006760	-	+	+	6	155	5	PlusC-OBP
Anopheles gambiae	Agam_OBP60	XP_564945.2	AGAP007281	+	+	+	6	198	5	PlusC-OBP
Anopheles gambiae	Agam_OBP61	XP_560792.5	AGAP007282	+	+	+	6	204	5	PlusC-OBP
Anopheles gambiae	Agam_OBP62	XP_312383.3	AGAP002556	+	+	+	6	174	5	Classic
Anopheles gambiae	Agam_OBP63	XP_551868.2	AGAP012322	+	+	+	6	135	5	Classic
Anopheles gambiae	Agam_OBP64	XP_551865.1	AGAP012324	+	+	+	6	142	5	Classic
Anopheles gambiae	Agam_OBP65*	XP_061496899.1	AGAP006759	-	-	+	4	207	5	PlusC-OBP
Anopheles gambiae	Agam_OBP66	XP_001230506.2	AGAP007283	+	+	+	6	212	5	PlusC-OBP
Anopheles gambiae	Agam_OBP67	XP_560792.5	AGAP012659	+	+	+	6	204	5	PlusC-OBP
Anopheles gambiae	Agam_OBP68	XP_001230506.2	AGAP012658	+	+	+	6	212	5	PlusC-OBP
Anopheles gambiae	Agam_OBP79*	XP_061503634.1	AGAP013182	+	+	+	4	222	5	Minus C OBP
Anopheles gambiae	Agam_OBP80	XP_316397.2	AGAP006368	+	+	+	6	200	5	Classic
Anopheles gambiae	Agam_OBP82	XP_061509490.1	AGAP012867	+	+	+	6	182	5	Atypical
Anopheles gambiae	Agam_OBP83	XP_061498701.1	AGAP012714	-	-	+	6	121	5	Classic
Cimex lectularius	Clec_OBP17	XP_014239601.1	LOC106661016	+	+	+	6	144	5	Classic
Cimex lectularius	Clec_OBP12	XP_014239603.1	LOC106661019	+	+	+	6	165	5	Classic
Cimex lectularius	Clec_OBP18	XP_014239823.1	LOC106661125	+	+	+	6	329	1	Atypical
Cimex lectularius	Clec_OBP23	XP_014240991.1	LOC106661826	+	+	+	6	163	5	Classic
Cimex lectularius	Clec_OBP7	XP_014242444.1	LOC106662719	+	+	+	6	132	5	Classic
Cimex lectularius	Clec_OBP2	XP_014243718.1	LOC106663413	+	+	+	6	154	5	Classic
Cimex lectularius	Clec_OBP16	XP_014243730.1	LOC106663425	+	+	+	6	139	5	Classic
Cimex lectularius	Clec_OBP1	XP_014243796.1	LOC106663458	+	+	+	6	180	5	Classic
Cimex lectularius	Clec_OBP11	XP_014246906.1	LOC106665174	+	+	+	6	160	5	Classic
Cimex lectularius	Clec_OBP20	XP_014246918.1	LOC106665187	+	+	+	6	177	5	Classic
Cimex lectularius	Clec_OBP25	XP_014246938.1	LOC106665193	+	+	+	6	146	5	Classic
Cimex lectularius	Clec_OBP24	XP_014246940.1	LOC106665197	+	+	+	6	158	5	Classic
Cimex lectularius	Clec_OBP26	XP_014246946.1	LOC106665202	+	+	+	6	154	5	Classic
Cimex lectularius	Clec_OBP10	XP_014247077.1	LOC106665270	+	+	+	6	149	5	Classic
Cimex lectularius	Clec_OBP4	XP_014247093.1	LOC106665283	+	+	+	6	154	5	Classic
Cimex lectularius	Clec_OBP27	XP_014247113.1	LOC106665300	+	+	+	6	151	5	Classic
Cimex lectularius	Clec_OBP28	XP_014247120.1	LOC106665306	+	+	+	6	148	5	Classic
Cimex lectularius	Clec_OBP14	XP_014247133.1	LOC106665313	+	+	+	6	138	5	Classic
Cimex lectularius	Clec_OBP13	XP_014248882.1	LOC106666311	+	+	+	6	168	5	Classic
Cimex lectularius	Clec_OBP19	XP_014249096.1	LOC106666419	+	+	+	6	153	5	Classic
Cimex lectularius	Clec_OBP5	XP_014253847.1	LOC106669092	+	+	+	6	146	5	Classic
Cimex lectularius	Clec_OBP8	XP_014257012.1	LOC106670871	+	+	+	6	134	5	Classic
Cimex lectularius	Clec_OBP22	XP_014257013.1	LOC106670872	+	+	+	6	133	5	Classic
Cimex lectularius	Clec_OBP15	XP_024084563.1	LOC106665176	-	-	+	6	171	5	Classic
Cimex lectularius	Clec_OBP3	XP_024084565.1	LOC106665175	+	+	+	6	145	5	Classic
Cimex lectularius	Clec_OBP21	XP_024084572.1	LOC106665187	-	+	+	6	154	5	Classic
Cimex lectularius	Clec_OBP9	XP_014251232.1	LOC106667663	+	+	+	6	203	5	PlusC-OBP
Cimex lectularius	Clec_OBP6	XP_014260439.1	LOC106673039	+	+	+	6	180	5	Classic
Drosophila melanogaster	Dmel_OBP18a	CG15883	FBgn0030985	+	+	+	6	102	5	Classic
Drosophila melanogaster	Dmel_OBP19a	CG11748	FBgn0031109	+	+	+	6	124	5	Classic
Drosophila melanogaster	Dmel_OBP19b	CG1670	FBgn0031110	+	+	+	6	131	5	Classic
Drosophila melanogaster	Dmel_OBP19c	CG15457	FBgn0031111	+	+	+	6	154	5	Classic
Drosophila melanogaster	Dmel_OBP19d	CG1668	FBgn0011280	+	+	+	6	127	5	Classic
Drosophila melanogaster	Dmel_OBP22a	CG31941	FBgn0043539	+	+	+		100	5	Classic
Drosophila melanogaster	Dmel_OBP28a	CG6641	FBgn0011283	+	+	+	6	122	5	Classic
Drosophila melanogaster	Dmel_OBP44a	CG2297	FBgn0033268	+	+	+	4	125	5	MinusC-OBP
Drosophila melanogaster	Dmel_OBP46a	CG12905	FBgn0033508	+	+	+	6	177	5	PlusC-OBP
Drosophila melanogaster	Dmel_OBP47a	CG12944	FBgn0033573	+	+	+	6	146	5	Classic
Drosophila melanogaster	Dmel_OBP47b	CG13208	FBgn0033614	+	+	+	6	177	5	PlusC-OBP
Drosophila melanogaster	Dmel_OBP49a	CG30052	FBgn0050052	+	+	+	6	190	5	PlusC-OBP
Drosophila melanogaster	Dmel_OBP50a	CG30067	FBgn0050067	+	+	+	6	155	5	PlusC-OBP
Drosophila melanogaster	Dmel_OBP50b	CG30073	FBgn0050073	+	+	+	6	219	5	PlusC-OBP
Drosophila melanogaster	Dmel_OBP50c	CG30072	FBgn0050072	+	+	+	6	167	5	PlusC-OBP
Drosophila melanogaster	Dmel_OBP50d	CG30074	FBgn0050074	+	+	+	6	156	5	PlusC-OBP
Drosophila melanogaster	Dmel_OBP50e	CG13939	FBgn0033931	+	+	+	6	176	5	PlusC-OBP
Drosophila melanogaster	Dmel_OBP51a	CG30473	FBgn0043530	+	+	+	6	98	5	Classic
Drosophila melanogaster	Dmel_OBP56a	CG11797	FBgn0034468	+	+	+	6	120	5	MinusC-OBP
Drosophila melanogaster	Dmel_OBP56b	CG30129	FBgn0046880	+	+	+	6	116	5	Classic
Drosophila melanogaster	Dmel_OBP56c	CG30128	FBgn0046879	-	-	+	6	245	5	Classic
Drosophila melanogaster	Dmel_OBP56d	CG11218	FBgn0034470	+	+	+	6	115	5	MinusC-OBP
Drosophila melanogaster	Dmel_OBP56e	CG8462	FBgn0034471	+	+	+	6	114	5	MinusC-OBP
Drosophila melanogaster	Dmel_OBP56f	CG30450	FBgn0043533	+	+	+	6	106	5	Classic
Drosophila melanogaster	Dmel_OBP56g	CG13873	FBgn0034474	+	+	+	6	113	5	Classic
Drosophila melanogaster	Dmel_OBP56h	CG13874	FBgn0034475	+	+	+	6	115	5	Classic
Drosophila melanogaster	Dmel_OBP56i	CG30448	FBgn0043532	+	+	+	6	117	5	Classic
Drosophila melanogaster	Dmel_OBP57a	CG30141	FBgn0043535	+	+	+	6	149	5	Classic
Drosophila melanogaster	Dmel_OBP57b	CG30142	FBgn0043534	+	+	+	6	119	5	Classic
Drosophila melanogaster	Dmel_OBP57c	CG13421	FBgn0034509	+	+	+	6	130	5	Classic
Drosophila melanogaster	Dmel_OBP57d	CG30150	FBgn0043536	+	+	+	6	107	5	Classic
Drosophila melanogaster	Dmel_OBP57e	CG30145	FBgn0050145	+	+	+	6	116	5	Classic
Drosophila melanogaster	Dmel_OBP58b	CG13518	FBgn0034768	+	+	+	6	185	5	PlusC-OBP
Drosophila melanogaster	Dmel_OBP58c	CG13524	FBgn0034769	+	+	+	6	181	5	PlusC-OBP
Drosophila melanogaster	Dmel_OBP58d	CG13519	FBgn0034770	+	+	+	6	199	5	PlusC-OBP
Drosophila melanogaster	Dmel_OBP59a	CG13517	FBgn0034766	+	+	+	6	182	5	Classic
Drosophila melanogaster	Dmel_OBP69a	CG10436	FBgn0011279	+	+	+	6	124	5	Classic
Drosophila melanogaster	Dmel_OBP73a	CG13027	FBgn0036681	+	+	+	6	240	5	Classic
Drosophila melanogaster	Dmel_OBP76a	CG8807	FBgn0020277	+	+	+	6	124	5	Classic
Drosophila melanogaster	Dmel_OBP83a	CG11421	FBgn0011281	+	+	+	6	121	5	Classic
Drosophila melanogaster	Dmel_OBP83b	CG11422	FBgn0010403	+	+	+	6	125	5	Classic
Drosophila melanogaster	Dmel_OBP83cd	CG15582	FBgn0046878	+	+	+	6	220	5	Classic
Drosophila melanogaster	Dmel_OBP83ef	CG31557	FBgn0046876	+	+	+	6	225	5	Classic
Drosophila melanogaster	Dmel_OBP83g	CG31558	FBgn0046875	+	+	+	6	123	5	Classic
Drosophila melanogaster	Dmel_OBP84a	CG1176	FBgn0011282	+	+	+	6	151	5	Classic
Drosophila melanogaster	Dmel_OBP85a	CG11732	FBgn0037589	-	-	+	6	177	5	PlusC-OBP
Drosophila melanogaster	Dmel_OBP8a	CG12665	FBgn0030103	+	+	+	4	135	5	MinusC-OBP
Drosophila melanogaster	Dmel_OBP93a	CG17284	FBgn0038859	+	+	+	6	177	5	PlusC-OBP
Drosophila melanogaster	Dmel_OBP99a	CG18111	FBgn0039678	+	+	+	6	126	5	Classic
Drosophila melanogaster	Dmel_OBP99b	CG7592	FBgn0039685	+	+	+	4	133	5	MinusC-OBP
Drosophila melanogaster	Dmel_OBP99c	CG7584	FBgn0039682	+	+	+	4	134	5	MinusC-OBP
Drosophila melanogaster	Dmel_OBP99d	CG15505	FBgn0039684	+	+	+	6	113	5	Classic
Halyomorpha halys	Hhal_OBP69	XM_014416375.2	gene=LOC106678078	+	+	+	6	147	5	Typical
Halyomorpha halys	Hhal_OBP24	XM_014416378.3	gene=LOC106678079	+	+	+	6	145	5	Typical
Halyomorpha halys	Hhal_OBP45	XM_014417849.2	gene=LOC106678969	+	+	+	6	132	2	Typical
Halyomorpha halys	Hhal_OBP4	XM_014417868.3	gene=LOC106678981	+	+	+	6	212	5	PlusC-OBP
Halyomorpha halys	Hhal_OBP28	XM_014417985.3	gene=LOC106679057	+	+	+	6	196	5	PlusC-OBP
Halyomorpha halys	Hhal_OBP3	XM_014418000.3	gene=LOC106679065	+	+	+	6	208	5	PlusC-OBP
Halyomorpha halys	Hhal_OBP9	XM_014419123.3	gene=LOC106679782	+	+	+	6	204	5	PlusC-OBP
Halyomorpha halys	Hhal_OBP32	XM_014420413.2	gene=LOC106680593	-	+	+	6	226	5	PlusC-OBP
Halyomorpha halys	Hhal_OBP46	XM_014421503.3	gene=LOC106681268	+	+	+	6	154	2	Typical
Halyomorpha halys	Hhal_OBP33	XM_014421523.1	gene=LOC106681282	+	+	+	6	191	5	PlusC-OBP
Halyomorpha halys	Hhal_OBP44	XM_014422399.2	gene=LOC106681859	+	+	+	6	148	5	Typical
Halyomorpha halys	Hhal_OBP31	XM_014422581.3	gene=LOC106681971	+	+	+	6	240	5	PlusC-OBP
Halyomorpha halys	Hhal_OBP47	XM_014423137.2	gene=LOC106682335	+	+	+	6	162	2	Typical
Halyomorpha halys	Hhal_OBP18	XM_014423650.2	gene=LOC106682662	+	+	+	6	241	5	PlusC-OBP
Halyomorpha halys	Hhal_OBP29	XM_014425657.3	gene=LOC106683908	+	+	+	6	237	5	PlusC-OBP
Halyomorpha halys	Hhal_OBP23	XM_014425849.3	gene=LOC106684020	+	+	+	6	143	5	Typical
Halyomorpha halys	Hhal_OBP38	XM_014425899.3	gene=LOC106684051	+	+	+	6	135	5	Typical
Halyomorpha halys	Hhal_OBP21	XM_014425911.3	gene=LOC106684062	+	+	+	6	154	5	Typical
Halyomorpha halys	Hhal_OBP37	XM_014426000.3	gene=LOC106684108	+	+	+	6	138	5	Typical
Halyomorpha halys	Hhal_OBP34	XM_014426031.3	gene=LOC106684130	+	+	+	6	149	5	Typical
Halyomorpha halys	Hhal_OBP12	XM_014426076.2	gene=LOC106684154	+	+	+	6	149	5	Typical
Halyomorpha halys	Hhal_OBP11	XM_014426104.3	gene=LOC106684171	+	+	+	6	139	5	Typical
Halyomorpha halys	Hhal_OBP17	XM_014426655.3	gene=LOC106684525	+	+	+	6	150	5	Typical
Halyomorpha halys	Hhal_OBP8	XM_014426706.3	gene=LOC106684554	+	+	+	6	143	5	Typical
Halyomorpha halys	Hhal_OBP27	XM_014426766.3	gene=LOC106684595	+	+	+	6	148	5	Typical
Halyomorpha halys	Hhal_OBP6	XM_014426781.3	gene=LOC106684600	+	+	+	6	140	5	Typical
Halyomorpha halys	Hhal_OBP30	XM_014427409.3	gene=LOC106684986	+	+	+	6	136	5	Typical
Halyomorpha halys	Hhal_OBP14	XM_014427815.3	gene=LOC106685252	+	+	+	6	148	5	Typical
Halyomorpha halys	Hhal_OBP48	XM_014427816.3	gene=LOC106685253	+	+	+	6	158	2	Typical
Halyomorpha halys	Hhal_OBP15	XM_014427821.3	gene=LOC106685257	-	+	+	6	164	5	Typical
Halyomorpha halys	Hhal_OBP16	XM_014427827.3	gene=LOC106685261	+	+	+	6		1	Typical
Halyomorpha halys	Hhal_OBP20	XM_014427829.3	gene=LOC106685262	+	+	+	6	138	5	Typical
Halyomorpha halys	Hhal_OBP25	XM_014427831.3	gene=LOC106685263	+	+	+	6	148	5	Typical
Halyomorpha halys	Hhal_OBP49	XM_014429769.2	gene=LOC106686444	+	+	+	6	156	2	Typical
Halyomorpha halys	Hhal_OBP50	XM_014429829.3	gene=LOC106686477	+	+	+	6	148	2	Typical
Halyomorpha halys	Hhal_OBP26	XM_014430748.3	gene=LOC106687067	-	+	+	6	171	5	Typical
Halyomorpha halys	Hhal_OBP1	XM_014431129.3	gene=LOC106687313	+	-	+	6	171	5	Typical
Halyomorpha halys	Hhal_OBP13	XM_014431555.3	gene=LOC106687581	+	+	+	6	190	5	PlusC-OBP
Halyomorpha halys	Hhal_OBP51	XM_014431559.2	gene=LOC106687585	+	+	+	6	191	2	PlusC-OBP
Halyomorpha halys	Hhal_OBP2	XM_014432354.2	gene=LOC106688070	+	+	+	6	175	5	Typical
Halyomorpha halys	Hhal_OBP52	XM_014432741.3	gene=LOC106688326	+	+	+	6	130	2	Typical
Halyomorpha halys	Hhal_OBP36	XM_014432743.2	gene=LOC106688327	+	+	+	6	128	5	Typical
Halyomorpha halys	Hhal_OBP53	XM_014432744.3	gene=LOC106688328	+	+	+	6	128	2	Typical
Halyomorpha halys	Hhal_OBP54	XM_014432747.3	gene=LOC106688333	+	+	+	6	129	2	Typical
Halyomorpha halys	Hhal_OBP41	XM_014432748.2	gene=LOC106688334	+	+	+	6	127	5	Typical
Halyomorpha halys	Hhal_OBP40	XM_014432749.3	gene=LOC106688335	+	+	+	6	128	5	Typical
Halyomorpha halys	Hhal_OBP43	XM_014432751.2	gene=LOC106688337	+	+	+	6	130	5	Typical
Halyomorpha halys	Hhal_OBP19	XM_014433682.3	gene=LOC106688963	+	+	+	6	140	5	Typical
Halyomorpha halys	Hhal_OBP7	XM_014433683.3	gene=LOC106688964	+	+	+	6	141	5	Typical
Halyomorpha halys	Hhal_OBP55	XM_014435110.2	gene=LOC106689899	+	+	+	6	189	2	PlusC-OBP
Halyomorpha halys	Hhal_OBP5	XM_014435938.3	gene=LOC106690499	+	+	+	6	333	5	Atypical
Halyomorpha halys	Hhal_OBP56	XM_014436320.2	gene=LOC106690772	+	+	+	6		2	Typical
Halyomorpha halys	Hhal_OBP57	XM_014436322.2	gene=LOC106690773	+	+	+	6	131	2	Typical
Halyomorpha halys	Hhal_OBP58	XM_014436606.2	gene=LOC106690982	+	+	+	6	149	2	Typical
Halyomorpha halys	Hhal_OBP59	XM_014437537.2	gene=LOC106691684	+	+	+	6	136	2	Typical
Halyomorpha halys	Hhal_OBP60	XM_024362419.2	gene=LOC106690771	+	+	+	6	129	2	Typical
Halyomorpha halys	Hhal_OBP61	XM_024362422.2	gene=LOC106684587	+	+	+	6	148	2	Typical
Halyomorpha halys	Hhal_OBP62	XM_024364044.2	gene=LOC106684101	+	+	+	6	148	2	Typical
Halyomorpha halys	Hhal_OBP10	XM_067046755.1	gene=LOC106683708	+	+	+	6	198	5	PlusC-OBP
Halyomorpha halys	Hhal_OBP63	XM_067046760.1	gene=LOC106692063	+	+	+	6	156	2	Typical
Halyomorpha halys	Hhal_OBP22	XM_067050085.1	gene=LOC106688452	+	+	+	6		5	Typical
Halyomorpha halys	Hhal_OBP42	XM_067052281.1	gene=LOC106688336	+	+	+	6	126	5	Typical
Halyomorpha halys	Hhal_OBP64	XM_067052282.1	gene=LOC106688324	-	-	+	6	126	2	Typical
Halyomorpha halys	Hhal_OBP65*	XM_067052283.1	gene=LOC106688331	-	-	+	5	102	3	Typical
Halyomorpha halys	Hhal_OBP66	XM_067052852.1	gene=LOC136797135	+	+	+	6		2	Typical
Halyomorpha halys	Hhal_OBP35	XM_067052854.1	gene=LOC106684563	+	-	+	6	148	5	Typical
Halyomorpha halys	Hhal_OBP67	XM_067052913.1	gene=LOC106683287	+	+	+	6	152	2	Typical
Halyomorpha halys	Hhal_OBP68	XM_067053634.1	gene=LOC106687586	+	+	+	6	190	2	PlusC-OBP
Nilaparvata lugens	Nlug_OBP11	XP_022184000.2	GeneID:111043376	+	+	+	6	220	5	Classic
Nilaparvata lugens	Nlug_OBP8	XP_022184299.1	GeneID:111043614	+	+	+	6	137	5	Classic
Nilaparvata lugens	Nlug_OBP12*	XP_039276909.1	GeneID:111047351	-			4	300	3 and 5	MinusC-OBP
Nilaparvata lugens	Nlug_OBP2	XP_039293531.1	GeneID:111049298	+	+	+	6	143	5	Classic
Nilaparvata lugens	Nlug_OBP3	XP_039293532.1	GeneID:111049430	+	+	+	6	147	5	Classic
Nilaparvata lugens	Nlug_OBP13	XP_022194015.2	GeneID:111051764	+	+	+	6	178	1	Classic
Nilaparvata lugens	Nlug_OBP14	XP_039284957.1	GeneID:111054159	+	+	+	6	354	5	Classic
Nilaparvata lugens	Nlug_OBP15	XP_039293533.1	GeneID:111057016	+	+	+	6	149	5	Classic
Nilaparvata lugens	Nlug_OBP6	XP_022200369.2	GeneID:111057244	+	+	+	6	196	5	Classic
Nilaparvata lugens	Nlug_OBP5	XP_039285824.1	GeneID:111058415	+	+	+	6	164	5	Classic
Nilaparvata lugens	Nlug_OBP16	XP_039285823.1	GeneID:111058416	-	+	+	6	271	5	Classic
Nilaparvata lugens	Nlug_OBP17*	XP_039285821.1	GeneID:111058419	-	-	+	5	105	3 and 5	Classic
Nilaparvata lugens	Nlug_OBP7	XP_039293856.1	GeneID:111059970	+	+	+	6	148	5	Classic
Nilaparvata lugens	Nlug_OBP9	XP_039288223.1	GeneID:111060025	-	-	+	6	259	5	PlusC-OBP
Nilaparvata lugens	Nlug_OBP1	XP_039286584.1	GeneID:111060128	+	+	+	6	173	5	Classic
Nilaparvata lugens	Nlug_OBP4	XP_039281294.1	GeneID:111046469	+	-	+	5	250	5	PlusC-OBP partial
Nilaparvata lugens	Nlug_OBP18	XP_022194821.2	GeneID:111052451	-	-	+	6	335	5	Atypical
Nilaparvata lugens	Nlug_OBP19	XP_022197830.2	GeneID:111054996	+	+	+	4	176	5	MinusC- OBP
Nilaparvata lugens	Nlug_OBP10	XP_022203344.2	GeneID:111060022	-	-	+	5	251	1	PlusC-OBP
Nezara viridula	Nvir_OBP5	CAH1389174.1	NEZAVI_LOCUS624	+	+	+	6	141	5	Classic
Nezara viridula	Nvir_OBP60*	CAH1389252.1	NEZAVI_LOCUS691	+	+	+	4	115	2	Partial
Nezara viridula	Nvir_OBP17	CAH1389322.1	NEZAVI_LOCUS745	+	+	+	6	152	5	Classic
Nezara viridula	Nvir_OBP1	CAH1389323.1	NEZAVI_LOCUS746	+	+	+	6	138	5	Classic
Nezara viridula	Nvir_OBP39	CAH1389324.1	NEZAVI_LOCUS747	+	+	+	6	161	5	Classic
Nezara viridula	Nvir_OBP11	CAH1389325.1	NEZAVI_LOCUS748	+	+	+	6	176	5	Classic
Nezara viridula	Nvir_OBP3	CAH1389326.1	NEZAVI_LOCUS749	+	+	+	6	148	5	Classic
Nezara viridula	Nvir_OBP7	CAH1389327.1	NEZAVI_LOCUS750	+	+	+	6	148	5	Classic
Nezara viridula	Nvir_OBP61	CAH1389393.1	NEZAVI_LOCUS808	+	+	+	6	257	2	PlusC-OBP
Nezara viridula	Nvir_OBP22	CAH1389518.1	NEZAVI_LOCUS915	+	+	+	6	241	5	PlusC-OBP
Nezara viridula	Nvir_OBP62	CAH1389905.1	NEZAVI_LOCUS1197	+	+	+	6	198	2	PlusC-OBP
Nezara viridula	Nvir_OBP24	CAH1389911.1	NEZAVI_LOCUS1201	+	+	+	6	198	5	PlusC-OBP
Nezara viridula	Nvir_OBP8	CAH1389913.1	NEZAVI_LOCUS1203	+	+	+	6	198	5	PlusC-OBP
Nezara viridula	Nvir_OBP15	CAH1390091.1	NEZAVI_LOCUS1348	+	+	+	6	149	5	Classic
Nezara viridula	Nvir_OBP16	CAH1390092.1	NEZAVI_LOCUS1349	+	+	+	6	149	5	Classic
Nezara viridula	Nvir_OBP28	CAH1390231.1	NEZAVI_LOCUS1465	+	+	+	6	212	5	PlusC-OBP
Nezara viridula	Nvir_OBP23	CAH1390678.1	NEZAVI_LOCUS1843	+	+	+	6	193	5	PlusC-OBP
Nezara viridula	Nvir_OBP9	CAH1390726.1	NEZAVI_LOCUS1880	+	+	+	6	175	5	Classic
Nezara viridula	Nvir_OBP63	CAH1390786.1	NEZAVI_LOCUS1923	+	+	+	6	316	1	PlusC-OBP
Nezara viridula	Nvir_OBP64	CAH1390929.1	NEZAVI_LOCUS2036	+	+	+	6	191	2	PlusC-OBP
Nezara viridula	Nvir_OBP53	CAH1390935.1	NEZAVI_LOCUS2042	-	+	+	6	128	5	PlusC-OBP
Nezara viridula	Nvir_OBP18	CAH1391405.1	NEZAVI_LOCUS2430	+	+	+	6	169	1	Classic
Nezara viridula	Nvir_OBP65	CAH1391406.1	NEZAVI_LOCUS2431	+	+	+	6	166	1	Classic
Nezara viridula	Nvir_OBP2	CAH1391407.1	NEZAVI_LOCUS2432	+	+	+	6	143	5	Classic
Nezara viridula	Nvir_OBP20	CAH1391408.1	NEZAVI_LOCUS2433	+	+	+	6	154	5	Classic
Nezara viridula	Nvir_OBP66	CAH1391409.1	NEZAVI_LOCUS2434	+	+	+	6	147	2	Classic
Nezara viridula	Nvir_OBP21	CAH1391410.1	NEZAVI_LOCUS2435	+	+	+	6	149	5	Classic
Nezara viridula	Nvir_OBP19	CAH1391411.1	NEZAVI_LOCUS2436	+	+	+	6	148	5	Classic
Nezara viridula	Nvir_OBP12	CAH1391412.1	NEZAVI_LOCUS2437	+	+	+	6	148	5	Classic
Nezara viridula	Nvir_OBP67	CAH1391414.1	NEZAVI_LOCUS2438	+	+	+	6	148	2	Classic
Nezara viridula	Nvir_OBP6	CAH1391415.1	NEZAVI_LOCUS2439	+	+	+	6	150	5	Classic
Nezara viridula	Nvir_OBP10	CAH1391416.1	NEZAVI_LOCUS2440	+	+	+	6	149	5	Classic
Nezara viridula	Nvir_OBP25	CAH1391417.1	NEZAVI_LOCUS2441	+	+	+	6	147	5	Classic
Nezara viridula	Nvir_OBP34	CAH1391418.1	NEZAVI_LOCUS2442	+	+	+	6	138	5	Classic
Nezara viridula	Nvir_OBP29	CAH1391420.1	NEZAVI_LOCUS2443	+	+	+	6	135	5	Classic
Nezara viridula	Nvir_OBP14	CAH1391422.1	NEZAVI_LOCUS2444	+	+	+	6	144	1	Classic
Nezara viridula	Nvir_OBP68	CAH1391457.1	NEZAVI_LOCUS2476	+	+	+	6	150	1	Classic
Nezara viridula	Nvir_OBP32	CAH1392066.1	NEZAVI_LOCUS2958	+	+	+	6	129	5	Classic
Nezara viridula	Nvir_OBP69	CAH1392068.1	NEZAVI_LOCUS2959	-	+	+	6	133	2	Classic
Nezara viridula	Nvir_OBP42	CAH1392070.1	NEZAVI_LOCUS2960	+	+	+	6	129	5	Classic
Nezara viridula	Nvir_OBP35	CAH1392071.1	NEZAVI_LOCUS2961	+	+	+	6	128	5	Classic
Nezara viridula	Nvir_OBP30	CAH1392072.1	NEZAVI_LOCUS2962	+	+	+	6	131	5	Classic
Nezara viridula	Nvir_OBP70	CAH1392073.1	NEZAVI_LOCUS2963	+	+	+	6	130	2	Classic
Nezara viridula	Nvir_OBP71	CAH1392074.1	NEZAVI_LOCUS2964	-	+	+	6	158	2	Classic
Nezara viridula	Nvir_OBP72	CAH1392075.1	NEZAVI_LOCUS2965	+	+	+	6	128	2	Classic
Nezara viridula	Nvir_OBP73	CAH1392079.1	NEZAVI_LOCUS2966	+	+	+	6	235	2	Two-Domain
Nezara viridula	Nvir_OBP57	CAH1392412.1	NEZAVI_LOCUS3228	+	+	+	6	159	5	Classic
Nezara viridula	Nvir_OBP74	CAH1392473.1	NEZAVI_LOCUS3284	+	+	+	6	148	2	Classic
Nezara viridula	Nvir_OBP75	CAH1392489.1	NEZAVI_LOCUS3297	+	+	+	6	148	2	Classic
Nezara viridula	Nvir_OBP13	CAH1392490.1	NEZAVI_LOCUS3298	+	+	+	6	151	5	Classic
Nezara viridula	Nvir_OBP76	CAH1392491.1	NEZAVI_LOCUS3299	+	+	+	6	150	2	Classic
Nezara viridula	Nvir_OBP77	CAH1392492.1	NEZAVI_LOCUS3300	+	+	+	6	155	2	Classic
Nezara viridula	Nvir_OBP78*	CAH1393496.1	NEZAVI_LOCUS4160	+	+	+	3	150	3 and 5	Partial
Nezara viridula	Nvir_OBP79	CAH1393498.1	NEZAVI_LOCUS4161	-	+	+	6	175	2	Classic
Nezara viridula	Nvir_OBP4	CAH1395043.1	NEZAVI_LOCUS5386	+	+	+	6	136	5	Classic
Nezara viridula	Nvir_OBP36	CAH1400871.1	NEZAVI_LOCUS10018	-	+	+	6	163	5	Classic
Nezara viridula	Nvir_OBP80*	CAH1402091.1	NEZAVI_LOCUS10991	+	+	+	4	235	3 and 5	Partial
Nezara viridula	Nvir_OBP48	CAH1402098.1	NEZAVI_LOCUS10997	-	+	+	6	171	5	Classic
Nezara viridula	Nvir_OBP26	CAH1402413.1	NEZAVI_LOCUS11233	+	+	+	6	334	5	Classic
Nezara viridula	Nvir_OBP37	CAH1406437.1	NEZAVI_LOCUS14367	+	+	+	6	235	5	PlusC-OBP
Nezara viridula	Nvir_OBP81	CAH1406555.1	NEZAVI_LOCUS14468	+	+	+	6	152	2	Classic
Nezara viridula	Nvir_OBP82*	CAH1407588.1	NEZAVI_LOCUS15274	+	+	+	5	189	3 and 5	Partial
Nezara viridula	Nvir_OBP27	CAH1407590.1	NEZAVI_LOCUS15275	+	+	+	6	197	5	PlusC-OBP
Nezara viridula	Nvir_OBP83*	CAH1408413.1	NEZAVI_LOCUS15946	+	+	+	4	117	3	Partial
Nezara viridula	Nvir_OBP84	CAH1408416.1	NEZAVI_LOCUS15948	+	+	+	6	187	2	Classic
Nezara viridula	Nvir_OBP85	CAH1408432.1	NEZAVI_LOCUS15959	+	+	+	6	129	2	Classic
Nezara viridula	Nvir_OBP86	CAH1408445.1	NEZAVI_LOCUS15970	+	+	+	6	129	2	Classic
Orius laevigatus	Olae_OBP22	Olae000987.1	ID=Olae000987	+	+	+	6	162	5	Classic
Orius laevigatus	Olae_OBP23	Olae002554.1	ID=Olae002554	+	+	+	6	161	1	Classic
Orius laevigatus	Olae_OBP5	Olae003013.1	ID=Olae003013	-	-	+	6	138	5	Classic
Orius laevigatus	Olae_OBP4	Olae003751.1	ID=Olae003751	+	+	+	6	296	5	PlusC-OBP
Orius laevigatus	Olae_OBP29	Olae003781.1	ID=Olae003781	+	+	+	6	137	5	Classic
Orius laevigatus	Olae_OBP9	Olae004773.1	ID=Olae004773	+	+	+	6	216	5	PlusC-OBP
Orius laevigatus	Olae_OBP24	Olae005941.1	ID=Olae005941	+	+	+	6	131	5	Classic
Orius laevigatus	Olae_OBP8	Olae007763.1	ID=Olae007763	+	+	+	6	135	5	Classic
Orius laevigatus	Olae_OBP10	Olae007987.1	ID=Olae007987	+	+	+	6	137	5	Classic
Orius laevigatus	Olae_OBP6	Olae010485.1	ID=Olae010485	+	+	+	6	297	5	PlusC-OBP
Orius laevigatus	Olae_OBP7	Olae011158.1	ID=Olae011158	+	+	+	6	137	5	Classic
Orius laevigatus	Olae_OBP12	Olae011192.1	ID=Olae011192	+	+	+	6	137	5	Classic
Orius laevigatus	Olae_OBP17	Olae013024.1	ID=Olae013024	+	+	+	6	146	5	Classic
Orius laevigatus	Olae_OBP30	Olae013026.1	ID=Olae013026	+	+	+	6	132	5	Classic
Orius laevigatus	Olae_OBP31	Olae013028.1	ID=Olae013028	+	+	+	6	124	5	Classic
Orius laevigatus	Olae_OBP32	Olae013029.1	ID=Olae013029	+	+	+	6	126	5	Classic
Orius laevigatus	Olae_OBP16	Olae014018.1	ID=Olae014018	+	+	+	6	131	5	Classic
Orius laevigatus	Olae_OBP18	Olae014640.1	ID=Olae014640	+	+	+	6	302	5	Atypical
Orius laevigatus	Olae_OBP20	Olae014684.1	ID=Olae014684	+	+	+	6	135	5	Classic
Orius laevigatus	Olae_OBP13	Olae014685.1	ID=Olae014685	-	-	+	6	202	5	Classic
Orius laevigatus	Olae_OBP14	Olae014686.1	ID=Olae014686	+	+	+		137	5	Classic
Orius laevigatus	Olae_OBP28	Olae014688.1	ID=Olae014688	+	+	+	6	173	5	Classic
Orius laevigatus	Olae_OBP19	Olae014690.1	ID=Olae014690	+	+	+	6	140	5	Classic
Orius laevigatus	Olae_OBP2	Olae014691.1	ID=Olae014691	+	+	+	6	137	5	Classic
Orius laevigatus	Olae_OBP33*	Olae014692.1	ID=Olae014692	-	-	+	4	82	3 and 5	Partial
Orius laevigatus	Olae_OBP26	Olae014693.1	ID=Olae014693	+	+	+	6	274	5	Two-Domain
Orius laevigatus	Olae_OBP25	Olae014694.1	ID=Olae014694	+	+	+		147	5	Classic
Orius laevigatus	Olae_OBP34*	Olae014695.1	ID=Olae014695	-	-	+	3	87	3	Partial
Orius laevigatus	Olae_OBP27	Olae014696.1	ID=Olae014696	+	+	+	6	148	5	Classic
Orius laevigatus	Olae_OBP21	Olae014697.1	ID=Olae014697	+	+	+	6	153	5	Classic
Orius laevigatus	Olae_OBP11	Olae014698.1	ID=Olae014698	-	-	+	6	126	1	Classic
Orius laevigatus	Olae_OBP3	Olae014699.1	ID=Olae014699	+	+	+	6	156	5	Classic
Orius laevigatus	Olae_OBP15	Olae014700.1	ID=Olae014700	+	+	+	6	142	5	Classic
Orius laevigatus	Olae_OBP1	Olae015568.1	ID=Olae015568	+	+	+	6	167	5	Classic
Rhodnius prolixus	Rpro_OBP22	RPRC000115-PA	RPRC000115	+	+	+	6	150	5	Classic	1
Rhodnius prolixus	Rpro_OBP17	RPRC000118-PA	RPRC000118	+	+	+	6	139	5	Classic	2
Rhodnius prolixus	Rpro_OBP23	RPRC000174-PA	RPRC000174	+	+	+	6	153	5	Classic
Rhodnius prolixus	Rpro_OBP13	RPRC000177-PA	RPRC000177	-	+	+	6	148	5	Classic
Rhodnius prolixus	Rpro_OBP26	RPRC000182-PA	RPRC000182	+	+	+	4	160	5	MinusC-OBP
Rhodnius prolixus	Rpro_OBP9	RPRC000194-PA	RPRC000194	+	+	+	6	128	5	Classic
Rhodnius prolixus	Rpro_OBP25*	RPRC000257-PA	RPRC000257	+	+	-	4	119	5	Parcial
Rhodnius prolixus	Rpro_OBP4	RPRC000274-PA	RPRC000274	-	-	+	5	161	5	Classic
Rhodnius prolixus	Rpro_OBP7	RPRC000311-PA	RPRC000311	+	+	+	6	131	5	PlusC-OBP
Rhodnius prolixus	Rpro_OBP2*	RPRC000378-PA	RPRC000378	-	-	+	5	103	3 and 5	Classic
Rhodnius prolixus	Rpro_OBP12	RPRC000492-PA	RPRC000492	+	+	+	4	150	5	MinusC-OBP
Rhodnius prolixus	Rpro_OBP3	RPRC000527-PA	RPRC000527	+	+	+	5	206	5	Classic
Rhodnius prolixus	Rpro_OBP10	RPRC000560-PA	RPRC000560	+	+	+	6	139	5	Classic
Rhodnius prolixus	Rpro_OBP8	RPRC000564-PA	RPRC000564	+	+	+	6	142	5	PlusC-OBP
Rhodnius prolixus	Rpro_OBP19	RPRC000593-PA	RPRC000593	+	+	+	6	146	5	Classic
Rhodnius prolixus	Rpro_OBP18	RPRC001924-PA	RPRC001924	-	-	+	6	176	5	Classic
Rhodnius prolixus	Rpro_OBP21	RPRC001925-PA	RPRC001925	+	+	+	6	141	5	Classic
Rhodnius prolixus	Rpro_OBP28	RPRC003602-PA	RPRC003602	+	+	+	5	203	1	Atypical
Rhodnius prolixus	Rpro_OBP14	RPRC004407-PA	RPRC004407	+	+	+	6	149	5	Classic
Rhodnius prolixus	Rpro_OBP11	RPRC004408-PA	RPRC004408	+	+	+	6	128	5	Classic
Rhodnius prolixus	Rpro_OBP6	RPRC004413-PA	RPRC004413	+	+	+	6	147	5	Classic
Rhodnius prolixus	Rpro_OBP20	RPRC007008-PA	RPRC007008	+	+	+	6	149	5	Classic
Rhodnius prolixus	Rpro_OBP15	RPRC008413-PA	RPRC008413	-	+	+	1	100	1	Classic
Rhodnius prolixus	Rpro_OBP24	RPRC009905-PA	RPRC009905	+	+	+	6	139	5	Classic
Rhodnius prolixus	Rpro_OBP27	RPRC009914-PA	RPRC009914	+	+	+	4	153	5	MinusC-OBP
Rhodnius prolixus	Rpro_OBP1	RPRC010284-PA	RPRC010284	+	+	+	6	146	5	Classic
Rhodnius prolixus	Rpro_OBP16	RPRC011610-PA	RPRC011610	-	-	-	5	137	5	Classic
Rhodnius prolixus	Rpro_OBP29	RPRC017720-PA	RPRC001772	+	+	+	6	177	1	Classic
*= Not included in phylogenetic analysis
1) Corrected, 2) Described here for the first time, 3) Partial sequence, 4) Present only in transcriptome, 5) automatic prediction confirmed.
