# Supplementary material for: Characterization of Odorant Binding and Chemosensory Protein Families in the kissing bug Triatoma infestans; comparative analysis among Heteroptera species
Source: Research Square preprint supplement (doi:10.21203/rs.3.rs-6384226/v1), 2025-05-15
Supplement: Supplementary file 2 [file f3502d63e261c85f48110f0a.xlsx]

## Sheet: Tinf_CSP
Docking of T. infestans CSP with different insecticides
Malathion
Target	Affinity	Avg_Affinity	rmsd_lb	rmsd_ub
Tinf_CSP19	-6.3	-6.01	3.78	6.46
Tinf_CSP15	-6.2	-5.86	5.3	7.31
Tinf_CSP2	-6.2	-5.81	1.65	3.89
Tinf_CSP10	-6.1	-5.33	2.03	4.12
Tinf_CSP12	-6.1	-5.77	1.82	3.27
Tinf_CSP14	-6.1	-5.76	1.88	3.9
Tinf_CSP13	-6	-5.73	2.28	4.02
Tinf_CSP3	-6	-5.74	2.68	4.61
Tinf_CSP1	-5.9	-5.65	2.72	4.58
Tinf_CSP11	-5.9	-4.82	8.03	9.53
Tinf_CSP16	-5.9	-5.58	2.81	5.05
Tinf_CSP17	-5.9	-5.46	2.79	5.75
Tinf_CSP23	-5.9	-5.6	2.15	4.26
Tinf_CSP6	-5.9	-5.42	4.4	6.52
Tinf_CSP24	-5.8	-4.68	11.98	13.29
Tinf_CSP25	-5.8	-5.12	5.31	7.48
Tinf_CSP5	-5.8	-5.53	2.29	4
Tinf_CSP8	-5.8	-5.59	2.14	3.77
Tinf_CSP22-partial	-5.7	-5.41	1.94	4.4
Tinf_CSP7	-5.7	-5.47	3.06	4.65
Tinf_CSP4	-5.6	-5.5	2.07	4.35
Tinf_CSP9	-5.5	-5.19	2.41	4.52
Tinf_CSP18	-5.4	-5.08	2.19	4.41
Tinf_CSP20	-5.4	-5.23	4.14	5.64
Tinf_CSP21	-5.4	-5.18	2.67	4.97
Tinf_CSP27	-5.2	-4.72	1.98	3.65
Tinf_CSP26-partial	-4.5	-3.96	10.4	12.47
Average:	-5.77778
STD:	0.374508
STDe:	0.073433
Deltamethrin
Target	Affinity	Avg_Affinity	rmsd_lb	rmsd_ub
Tinf_CSP19	-11	-9.96	3.78	7.31
Tinf_CSP17	-10.7	-10.35	1.12	1.67
Tinf_CSP11	-10.4	-9.12	1.46	1.85
Tinf_CSP8	-10.4	-10.08	4.53	7.33
Tinf_CSP2	-10.2	-9.73	3.16	4.84
Tinf_CSP1	-10.1	-9.52	3.62	6.66
Tinf_CSP25	-10	-9.19	2.99	5.3
Tinf_CSP15	-9.9	-9.59	4.19	6.37
Tinf_CSP5	-9.8	-9.07	2.48	4.68
Tinf_CSP4	-9.7	-9.01	2.63	3.91
Tinf_CSP10	-9.6	-8.2	6.23	10.7
Tinf_CSP14	-9.6	-9.18	2.74	5.49
Tinf_CSP20	-9.6	-8.76	3.89	6.59
Tinf_CSP12	-9.5	-9.1	2.72	4.5
Tinf_CSP21	-9.5	-9.01	2.57	5.39
Tinf_CSP9	-9.5	-8.98	3.28	6.28
Tinf_CSP16	-9.4	-8.95	3.37	5.95
Tinf_CSP18	-9.4	-8.03	11.07	13.78
Tinf_CSP13	-9.3	-9.16	2.94	4.89
Tinf_CSP3	-9.3	-8.92	4.45	7.09
Tinf_CSP22-partial	-9.1	-7.12	4.24	7.7
Tinf_CSP6	-9	-8.72	4.1	7.01
Tinf_CSP23	-8.9	-7.77	7.11	9.28
Tinf_CSP7	-7.8	-6.71	5.54	8.03
Tinf_CSP27	-7.6	-6.72	8.71	10.71
Tinf_CSP24	-6.8	-6.01	12.48	14.44
Tinf_CSP26-partial	-4.5	-4.32	6.73	9.33
Average:	-9.28148
STD:	1.31706
STDe:	0.258247
Fipronil
Target	Affinity	Avg_Affinity	rmsd_lb	rmsd_ub
Tinf_CSP10	-10.1	-8.38	8.37	10.06
Tinf_CSP24	-9.9	-8.52	5.12	6.87
Tinf_CSP8	-9.6	-8.93	2.48	4.59
Tinf_CSP11	-9.5	-8.89	2.02	4.49
Tinf_CSP19	-9.4	-9.07	4.24	6.74
Tinf_CSP15	-9.3	-8.8	6.39	7.81
Tinf_CSP13	-9.2	-8.61	3.68	4.67
Tinf_CSP17	-9.2	-8.35	2.23	3.63
Tinf_CSP22-partial	-9.2	-8.18	3	4.19
Tinf_CSP21	-9.1	-8.49	2.12	3.22
Tinf_CSP23	-9.1	-7.99	6.68	7.83
Tinf_CSP25	-9.1	-8.42	4.09	5.27
Tinf_CSP5	-9.1	-8.54	3.69	5.46
Tinf_CSP12	-9	-8.12	3.22	4.23
Tinf_CSP20	-9	-8.15	3.58	4.55
Tinf_CSP2	-8.9	-8.37	1.96	2.85
Tinf_CSP4	-8.9	-8.26	2.8	3.88
Tinf_CSP6	-8.9	-8.37	5.5	7.57
Tinf_CSP9	-8.9	-8.08	3.15	4.62
Tinf_CSP14	-8.8	-8.45	4.15	5.54
Tinf_CSP16	-8.7	-8.4	3.74	5.46
Tinf_CSP1	-8.6	-7.85	5.42	6.55
Tinf_CSP3	-8.6	-7.97	3.95	4.99
Tinf_CSP7	-8.1	-7.69	2.69	5.41
Tinf_CSP27	-7.7	-6.64	4.4	6.22
Tinf_CSP18	-7.6	-7.3	4.24	5.54
Tinf_CSP26-partial	-5.8	-5.5	11.15	12.63
Average:	-8.86296
STD:	0.825622
STDe:	0.161887

## Sheet: Tinf_OBP
Docking of T. infestans OBP with different insecticides
Malathion
Target	Affinity	Avg_Affinity	rmsd_lb	rmsd_ub
Tinf_OBP45	-6.82	-5.96	2.36	5.07
Triin_OBP20	-6.6	-6.02	1.99	3.62
Triin_OBP35	-6.39	-5.76	3.63	5.81
Triin_OBP32	-6.37	-5.76	2.17	3.87
Triin_OBP31	-6.31	-5.56	1.9	3.45
Triin_OBP11	-6.2	-5.87	2.42	4.51
Triin_OBP18	-6.07	-5.6	2.66	5.04
Triin_OBP42	-5.96	-4.29	6.28	8.2
Triin_OBP30	-5.94	-4.39	6.14	8.4
Triin_OBP10	-5.91	-5.59	1.97	4.27
Triin_OBP41	-5.73	-5.48	2.19	4.49
Triin_OBP19	-5.71	-5.16	1.98	4.91
Triin_OBP14	-5.45	-4.88	11.16	13.24
Triin_OBP9	-5.39	-5.13	2.17	3.97
Triin_OBP38	-5.34	-4.75	6.84	8.63
Triin_OBP7	-5.34	-4.13	6.99	9.43
Triin_OBP17	-5	-4.55	1.93	5.2
Triin_OBP15	-5	-3.45	4.51	6.96
Tinf_OBP48	-4.99	-4.52	2.02	4.78
Triin_OBP24	-4.91	-3.87	10.36	12.15
Triin_OBP5	-4.88	-3.23	7.14	9.04
Triin_OBP6	-4.84	-4.52	2.37	4.85
Triin_OBP27	-4.78	-4.48	2.11	4.09
Triin_OBP40	-4.78	-1.63	5.69	7.41
Triin_OBP34	-4.76	-4.36	2.68	4.99
Triin_OBP25	-4.75	-4.05	4.91	6.97
Triin_OBP23	-4.75	-3.94	4.19	6.58
Tinf_OBP49	-4.66	-4.55	3.36	5.9
Triin_OBP3	-4.66	12.81	8.09	10.23
Triin_OBP28	-4.64	-3.64	8.41	10.57
Triin_OBP36	-4.52	-4	2.52	4.76
Triin_OBP4	-4.5	-4.13	2.06	3.71
Triin_OBP37	-4.47	-3.54	13.25	15.65
Triin_OBP33	-4.4	-3.81	2.17	4.42
Triin_OBP13	-4.3	-4.02	2.16	4.23
Triin_OBP16	-4.28	22.95	2.51	4.83
Tinf_OBP44	-4.26	-3.98	3.17	5.12
Triin_OBP26	-4.25	-2	10.07	11.98
Triin_OBP29	-3.98	-3.69	2.08	4.21
Triin_OBP21	-3.95	-3.65	1.76	3.5
Triin_OBP39	-3.87	-3.09	11.16	12.94
Tinf_OBP46	-3.83	-3.47	1.84	3.37
Triin_OBP8	-3.8	-3.33	3.5	5.93
Triin_OBP22	-3.73	-1.75	2.41	4.66
Triin_OBP1	-3.66	-0.79	8	9.05
Triin_OBP2	-3.62	-3.11	4.94	6.94
Triin_OBP12	-3.48	-3.15	6.18	8.23
Triin_OBP43	-3.47	-2.67	3.78	6.21
Tinf_OBP47	-1.58	5.78	6.24	8.15
Average:	-4.83429
STD:	1.00737
STDe:	0.14391
Deltamethrin
Target	Affinity	Avg_Affinity	rmsd_lb	rmsd_ub
Tinf_OBP45	-10.22	-6.29	2.84	5.45
Tinf_OBP18	-9.36	-8.98	2.88	5.94
Tinf_OBP41	-8.78	-7.6	4.77	7.21
Tinf_OBP20	-8.66	-5.98	5.54	7.66
Tinf_OBP35	-8.45	-8.23	2.61	4.99
Tinf_OBP11	-8.18	-7.68	2.48	4.99
Tinf_OBP9	-8.14	-7.95	1.97	3.08
Tinf_OBP48	-7.93	-7.3	2.26	3.38
Tinf_OBP10	-7.5	-6.79	3.02	5.23
Tinf_OBP42	-7.44	-6.43	8.58	10.48
Tinf_OBP31	-7.42	-6.19	6.25	8.25
Tinf_OBP33	-7.26	-6.23	3.01	4.9
Tinf_OBP40	-7.21	-6.71	2.75	4.38
Tinf_OBP49	-7.17	-6.48	2.73	4.71
Tinf_OBP15	-7.17	-6.18	2.27	4.04
Tinf_OBP24	-6.78	-5.79	11.33	14.09
Tinf_OBP13	-6.56	-5.72	9.04	11.17
Tinf_OBP17	-6.54	-4.21	4.37	8.31
Tinf_OBP34	-6.46	-6.19	2.91	4.44
Tinf_OBP7	-6.28	-5.74	2.26	4.1
Tinf_OBP25	-6.27	-5.74	5.1	7.8
Tinf_OBP46	-6.22	-4.94	3.37	5.54
Tinf_OBP14	-6.21	-5.53	2.44	4.03
Tinf_OBP47	-6.11	15.9	2.76	5.18
Tinf_OBP16	-6.02	-4.33	3.54	7.53
Tinf_OBP4	-6	-5.5	2.86	6.14
Tinf_OBP23	-5.83	-5.58	10.48	12.82
Tinf_OBP29	-5.81	-5.47	4.18	7.47
Tinf_OBP44	-5.71	-5.33	3.03	5.03
Tinf_OBP43	-5.71	-5.12	2.89	4.66
Tinf_OBP32	-5.58	-4.68	2.8	5.97
Tinf_OBP36	-5.52	-4.65	8.33	10.05
Tinf_OBP12	-5.42	-4.84	4.25	7.39
Tinf_OBP30	-5.34	-4.87	4.37	7.07
Tinf_OBP19	-5.33	-4.79	2.35	4.02
Tinf_OBP6	-5.24	17.69	5.93	8.92
Tinf_OBP3	-5.23	-3.89	6.09	7.84
Tinf_OBP1	-5.22	0.59	8.16	9.57
Tinf_OBP8	-5.2	-4.59	5.1	7.47
Tinf_OBP37	-5.18	-4.87	2.72	5.23
Tinf_OBP38	-5.14	-4.37	3.62	6.69
Tinf_OBP21	-5.08	-4.54	2.27	4.62
Tinf_OBP28	-4.63	-2.84	14.03	16.48
Tinf_OBP39	-4.6	-4.04	2.82	4.87
Tinf_OBP22	-4.03	-0.68	2.81	4.81
Tinf_OBP5	-2.71	-1.58	8.95	11.19
Tinf_OBP2	-2.63	32.75	7.73	9.72
Tinf_OBP27	-2.48	-0.78	2.33	4.43
Tinf_OBP26	-1.25	16.78	11.99	14.91
Average:	-6.10633
STD:	1.75362
STDe:	0.250517
Fipronil
Target	Affinity	Avg_Affinity	rmsd_lb	rmsd_ub
Tinf_OBP16	-9.83	-8.19	3.66	6.03
Tinf_OBP18	-8.97	-8.3	2.34	4.27
Tinf_OBP20	-8.81	-7.99	2.33	4.72
Tinf_OBP35	-8.21	-6.88	2.39	5.29
Tinf_OBP11	-7.98	-7.36	2.59	4.11
Tinf_OBP41	-7.68	-7.35	3.44	4.84
Tinf_OBP46	-7.64	-4.81	5.5	7.12
Tinf_OBP40	-7.61	-7.08	1.86	2.93
Tinf_OBP10	-7.56	-6.96	2.99	5.93
Tinf_OBP9	-7.28	-6.98	3.03	4.37
Tinf_OBP15	-7.05	-6.09	2.11	4.24
Tinf_OBP7	-6.96	-6.02	9.05	10.06
Tinf_OBP49	-6.88	-6.48	4.7	7.6
Tinf_OBP31	-6.7	-5.78	5.34	7.07
Tinf_OBP19	-6.55	-5.77	2.39	5.31
Tinf_OBP48	-6.41	-5.96	2.62	4.24
Tinf_OBP34	-6.37	-5.95	5.6	8.01
Tinf_OBP6	-6.3	18.82	14.05	16.03
Tinf_OBP1	-6.01	-4.95	6.23	8.24
Tinf_OBP23	-5.99	-5.62	5.84	7.75
Tinf_OBP42	-5.97	-5.23	3.19	5.87
Tinf_OBP25	-5.89	-5.27	4.83	6.09
Tinf_OBP27	-5.78	-3.66	8.56	10.59
Tinf_OBP13	-5.72	-4.15	4.13	5.65
Tinf_OBP44	-5.71	9.91	8.75	10.33
Tinf_OBP45	-5.71	-4.78	1.95	3.87
Tinf_OBP5	-5.69	-2.99	8.91	10.04
Tinf_OBP14	-5.6	-4.92	2.72	5.43
Tinf_OBP47	-5.56	-3.1	2.78	4.97
Tinf_OBP33	-5.53	-5.13	3.84	5.97
Tinf_OBP28	-5.46	-4.81	3.36	5.17
Tinf_OBP36	-5.46	-3.01	4.96	5.96
Tinf_OBP4	-5.44	-5.03	1.96	3.88
Tinf_OBP32	-5.27	-4.72	8.51	10.45
Tinf_OBP2	-5.25	12.25	4.67	6.05
Tinf_OBP29	-5.13	-4.86	6.67	9.38
Tinf_OBP24	-5.12	-4.35	4.54	6.9
Tinf_OBP21	-5.1	-4.76	3.16	6.08
Tinf_OBP37	-4.99	-4.8	2.68	4.18
Tinf_OBP17	-4.95	-3.53	1.85	3.64
Tinf_OBP22	-4.95	-3.86	3.55	6.2
Tinf_OBP3	-4.86	-4.15	2.71	3.54
Tinf_OBP38	-4.81	-3.39	12.94	13.96
Tinf_OBP12	-4.77	-4.49	3.98	5.25
Tinf_OBP43	-4.7	-4.14	6.28	7.34
Tinf_OBP39	-4.68	-3.61	15.66	16.84
Tinf_OBP30	-4.62	-4.09	13.51	15.2
Tinf_OBP8	-4.43	-3.52	7.51	9.41
Tinf_OBP26	4.43	8.14	1.09	1.95
Average:	-5.90837
STD:	1.96476
STDe:	0.28068
